# Supplementary material for: Proximity Interactome Analysis of Super Conserved Receptors Expressed in the Brain Identifies EPB41L2, SLC3A2, and LRBA as Main Partners
Source: MDPI journal article supplement (doi:10.3390/cells12222625), 2023-11-14
Supplement: s1 [file s1]

# Supplementary Materials:

1

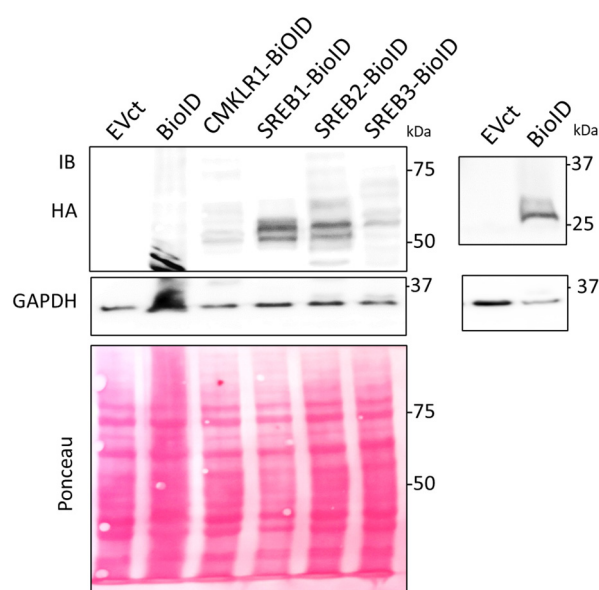

2

3

**Supplementary Figure S1:** BioID-SREBs are expressed in HEK293 cells. Total cell lysates of transfected HEK293T cells were analyzed by Western blotting (following 8% polyacrylamide gels or 12% gels for BioID-alone) and the fusion proteins were detected using anti-HA antibodies (or anti-GAPDH as reference). The protein load was monitored by Ponceau staining. Western blots are representative of three independent experiments.

4

5

6

7

8

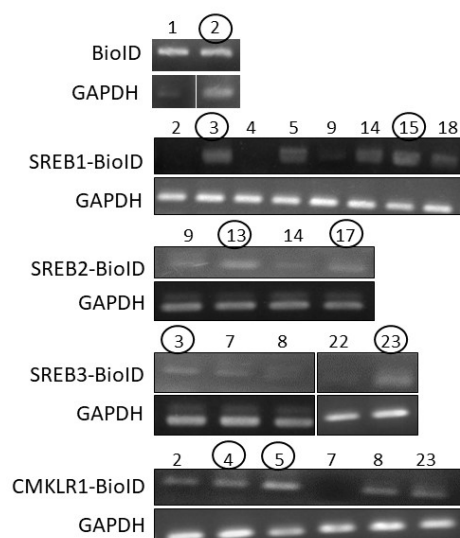

9

10

**Supplementary Figure S2 :** Selection of HEK293 clones stably expressing BioID fusion proteins based on RT-PCR. Clones resulting from G418 selection were analyzed by reverse transcriptase-polymerase chain reaction (RT-PCR) for expression of the receptor-BioID fusions. Representative agarose gels show expression of BioID, SREB1-BioID, SREB2-BioID, SREB3-BioID, and CMKLR1-BioID in different HEK293 clones. The reference gene used was glyceraldehyde phosphate dehydrogenase (GAPDH). Black circles indicate the clones selected for further experiments.

11

12

13

14

15

16

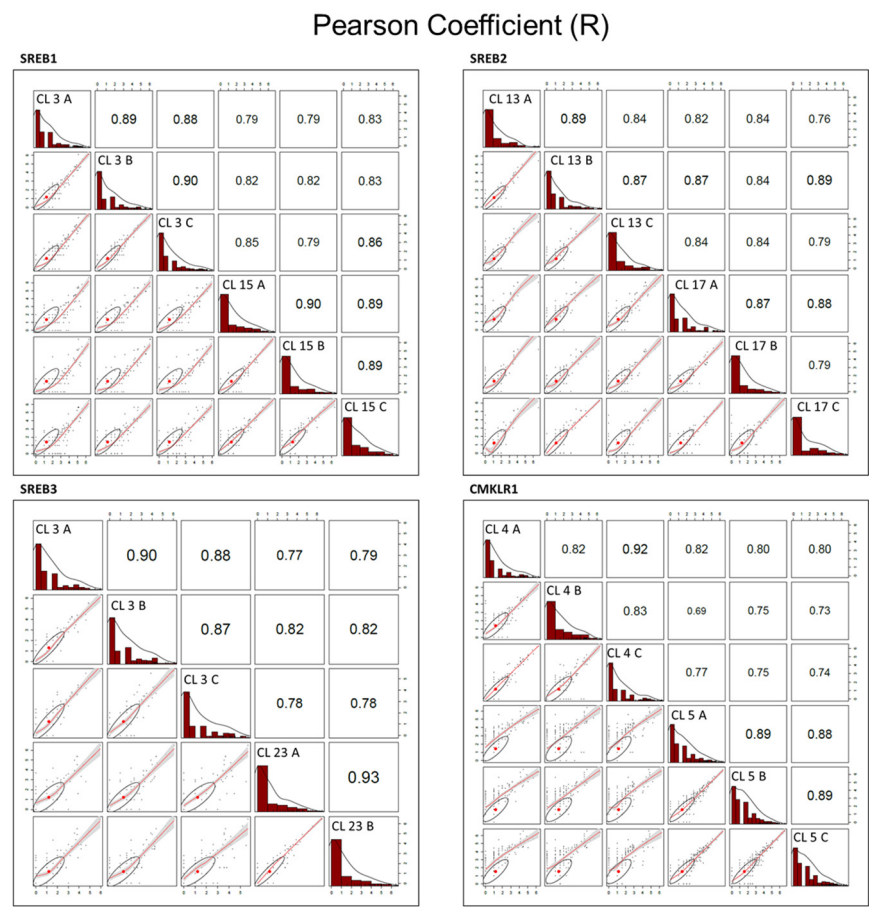

**Supplementary Figure S3 :** Pair panel matrices of spectral counts pairwise combinations of all replicates in BioID assay. Scatter plots of the number of spectral counts of all combinations of the two biological clones (CL) and three technical replicates (A, B, and C) of each GPCR and its relative Pearson coefficient (R)

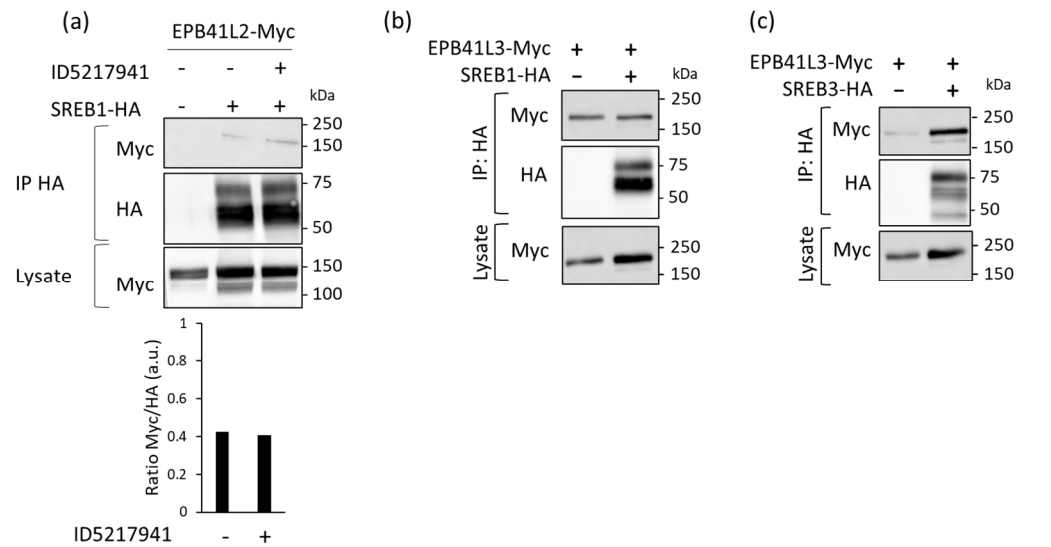

**Supplementary Figure S4 :** Physical interactions of SREB1 and SREB3 with EPB41L proteins. (a) The interaction of SREB1 and EPB41L2 was not affected by the presence of the ID5217941 agonist. SREB1-BioID2-HA and Myc-tagged EPB41L2 were co-transfected in HEK293T cells and treated with 15  $\mu$ M of ID5217941. Expression of EPB41L2 was monitored by immunoblotting of the total cell

27  
28  
29  
30  
31  
32  
33  
34

35

36  
37  
38  
39  
40  
41  
42

49

**Supplementary Table S1:** Internal primer sequences used to validate the expression of the genes of interest and the housekeeping gene glyceraldehyde phosphate dehydrogenase (GAPDH) (as a reference) in BioID constructs.

| Gene                 | Sequence               | Amplicon | Position     |
|----------------------|------------------------|----------|--------------|
| SREB1-BioID Forward  | TCCTCTTCAACAGGGAGCTG   | 239 bp   | 1015-1254 bp |
| SREB1-BioID Reverse  | GTAGCTCACGTTCCACTCCT   |          |              |
| SREB2-BioID Forward  | CAGCACAACCCTTCTTTAC    | 188 bp   | 1050-1234 bp |
| SREB2-BioID Reverse  | TCACGTTCCACTCCTTCAGTC  |          |              |
| SREB3-BioID Forward  | AATTGTCTGCTTCCTGCTCAAC | 233 bp   | 1010-1234 bp |
| SREB3-BioID Reverse  | TCACGTTCCACTCCTTCAGTC  |          |              |
| CMKLR1-BioID Forward | ACTCTTCCTACCCCAGCCATAG | 213 bp   | 1024-1237 bp |
| CMKLR1-BioID Reverse | TCACGTTCCACTCCTTCAGTC  |          |              |
| BioID-only Forward   | CGGGTCTGGAGGCGGGGGTAG  | 318 bp   | 12-329 bp    |
| BioID-only Reverse   | CACTTCAGGCTGAAGGGGATC  |          |              |
| GAPDH Forward        | GGATTTGGTCGTATTGGGCG   | 240 bp   | 28-267 bp    |
| GAPDH Reverse        | ATCGCCCCACTTGATTTTGG   |          |              |
